# Supplementary material for: Need for split: integrative taxonomy reveals unnoticed diversity in the subaquatic species of Pseudohygrohypnum (Pylaisiaceae, Bryophyta)
Source: PeerJ. 2022 Apr 26;10:e13260. doi: 10.7717/peerj.13260 (PMC9053303; doi:10.7717/peerj.13260)
Supplement: Supplemental Information 1 — For newly generated sequences accession numbers are in bold and specimen voucher information is provided [file peerj-10-13260-s001.xlsx]

## Sheet: Appendix 1
organism	Isolate	Isolate source	nrITS	trnS-rps4	trnL-trnF	AtpB-rbcL	rbcL	trnK-psbA
Ectropothecium leptochaeton	Camara et al.	Brazil, Pinheiro & Costa 466	MG734672	-	MG734667	-	-	-
Aquilonium adscendens	Hz1478	Russia, Kunashir Island, Ignatov 06-1950 (CBFS)	MK327305	MZ209527	MK313987	MK313899	OK847673	OK847700
Aquilonium adscendens	Hz1479	Russia, Kunashir Island, Ignatov 06-1895 (CBFS)	MK327306	-	MK313988	MK313900	-	-
Aquilonium plicatulum	Hy1010	Russia: Chita, Afonina s.n., CBFS:14383	MH613443	-	MH613668	MH613547	-	-
Aquilonium plicatulum	Hy1503	Russia: Irkutskaya,Pik Taltsinskiy, CBFS:Kucera 20336	MK327335	-	MK314019	MK313933	-	-
Aquilonium plicatulum	Hy976	Russia: Shikotan, Bakalin K-64-7-07 (MHA)	MH613442	-	MH613667	MH613546	-	-
Buckia vaucheri	Hy1508	Russia: Irkutskaya,Slyudyanka, CBFS:Kučera 20345	MK327345	-	MK314028	MK313943	-	-
Buckia vaucheri	Hy544	Czech Republic, Devin Kucera 11932 (CBFS)	MH613471	MZ209528	MH613696	MH613563	OK847691	OK847719
Calliergonella cuspidata	Cl1193	France, Lac de Montcineyre Kučera 18817 (CBFS)	MH613357	MZ209519	MH613583	MH613494	-	-
Calliergonella cuspidata	GenBank	GenBank	MT354752	MT354752	MT354752	MT354752	MT354752	MT354752
Calliergonella lindbergii	Hy1035	Czech Republic, Zliv, Kučera 17061 CBFS()	MH613358	MZ209518	MH613584	MH613495	-	-
Calliergonella lindbergii	Hy1509	Russia, Irkutskaya, Khamar-Daban, CBFS:Kučera 20331	-	-	MK313971	MK313883	-	-
Calliergonellopsis dieckii	Hy1474	Japan: Mt Hiuchigatake, MW9021823	MK327326	MZ209523	MK314010	MK313924	OK847667	OK847695
Calliergonellopsis dieckii	Hy662	Russia: Kunashir, Ignatov 06-1417 (MHA)	MH613416	-	MH613641	MH613530	-	-
Calliergonellopsis dieckii	Hy870	Russia: Kunashir, Ignatov 06-3113 (MHA)	MH613417	-	MH613642	-	-	-
Calohypnum amabile	Hy1482	Bolivia: La Paz,Prov. Bautista Saavedra, DUKE:Fuentes & Poma 10916	MK327312	-	MK313994	MK313906	-	-
Calohypnum amabile	Hy1532	Colombia, Cundinamarca, DUKE:Churchill 19425	MK327313	MZ209531	MK313995	MK313907	OK847674	OK847701
Calohypnum amabile	Hy1543	China: Yunnan,Dali County, DUKE:B.Shaw 5583	MK327314	-	MK313996	MK313908	-	-
Calohypnum oldhamii	Hy1043	Japan: Miyajima, Inoue 3380, CBFS:18019	MH613434	MZ209532	MH613659	MH613542	OK847670	OK847698
Calohypnum plumiforme	Hy1484	Russia: Primorsky, Ignatov 07-2 (CBFS)	MK327336	-	MK314020	MK313934	-	-
Calohypnum plumiforme	Hy1485	Russia, Primorsky Territory, Mt Sestra, Ignatov 08-249	MK327337	MZ209533	MK314021	MK313935	OK847675	OK847702
Calohypnum plumiforme	Hy251	Russia: Primorsky, Ignatov 07-2 (MHA)	MH613444	-	MH613669	MH613548	-	-
Calohypnum plumiforme	Hy660	Russia: Primorsky, Ignatov 08-262 (MHA)	MH613445	-	MH613670	MH613549	-	-
Calohypnum sakuraii	Hy1483	Japan: Shikoku, Deguchi Bryophytes of Asia No. 82 (CBFS)	MK327341	MZ209534	MK314025	MK313939	OK847676	OK847703
Calohypnum sakuraii	Hy671	Japan: Shikoku, Deguchi Bryophytes of Asia No. 82 (MHA)	MH613458	-	MH613683	-	-	-
Chryso-hypnum patens	Ch1533	South Africa: Tsitsikamma, DUKE:Vanderpoorten 265	MK327295	MZ209525	MK313977	MK313889	OK847668	OK847696
Ectropothecium dealbatum	Ec29	Brunei, Tan 95-1272 (MHA)	MH613372	-	MH613598	-	-	-
Ectropothecium sp.	Ep1458	Cameroon: Mount Cameroon, Altman s.n., CBFS:16371	MK327297	MZ209535	MK313979	MK313891	OK847672	OK847704
Ectropothecium sp.	Ep1546	China: Yunnan,Yulong County, DUKE:B.Shaw 5686	MK327298	-	MK313980	MK313892	-	-
Gollania turgens	Go1500	Russia, Irkutskaya Province, Slyudyanka Kucera 20344 CBFS	MK327303	MZ209526	MK313985	MK313897	OK847669	OK847697
Homomallium connexum?	Hubei 6	China, see Cai et al., 2019, arXiv preprint arXiv:1902.06032	KF770673	KF770565	KF770511	KF770619	-	-
Homomallium incurvatum	Ho1352	Czech Republic: Drbakov, Kucera 13729 (CBFS)	MH613383	MZ209529	MH613609	MH613511	-	-
Homomallium plagiangium	Ho670	Russia: Vladivostok, Ignatov et al. 06-2463 (MHA)	MH613384	-	MH613610	-	-	-
Pseudohygrohypnum appalachianum	Hh2273I	Maine, Lake Megunticook, Allen 14642 (DUKE)	MZ218016	MZ209547	MZ209478	MZ209435	-	-
Pseudohygrohypnum appalachianum	HyF38	North Carolina, Brinda 11911 (MW)	MZ218018	MZ209548	MZ209479	MZ209437	OK847682	OK847710
Pseudohygrohypnum appalachianum	HyF39	North Carolina, Brinda 11916 (MW)	MZ218017	MZ209549	MZ209480	MZ209436	-	-
Pseudohygrohypnum calcicola	Hy657	Russia: Primorsky, Chandolaz, Ignatov 07-27 (MHA)	MH613391	-	MH613617	MH613517	-	-
Pseudohygrohypnum calcicola	HyF51	Primorsky Territory, 13-1934 (MW)	MZ218005	MZ209537	MZ209471	MZ209424	OK847679	OK847707
Pseudohygrohypnum densirameum	Hy1481	Kunashir Ignatov 06-1307	MK327324	MZ209538	MK314008	MK313922	-	-
Pseudohygrohypnum densirameum	Hy858	Russia: Kunashir, Ignatov 06-1307 (MHA)	MH613419	-	MH613644	MH613531	-	-
Pseudohygrohypnum eugyrium	Hakelier	MHA, S, coll. Hakelier	AY695737, AY695790	MZ209546	AY857558	AY857579	-	-
Pseudohygrohypnum eugyrium	HyF15	Austria: Bad Zell, Schluesslmayr s.n. (CBFS:12715)	MK327311	MZ209543	MK313993	MK313905	OK847681	OK847709
Pseudohygrohypnum eugyrium	HyF16	UK, Scotland, Kucera, CBFS:10096	MZ218014	MZ209544	MZ209476	MZ209433	-	-
Pseudohygrohypnum eugyrium	HyF31	Hedenas 31092 (MHA)	MZ218015	MZ209545	AY683608	MZ209434	-	-
Pseudohygrohypnum fauriei	Hy1480	Russia, Primorsky Ussuriysky Ignatov 08-226 CBFS 20246	MK327327	MZ209553	MK314011	MK313925	OK847684	OK847712
Pseudohygrohypnum fauriei	Hy17	Russia: Khabarovsk,Bureya River, Ignatov 97-216 (MHA)	MH613418	MZ209552	MH613643	-	-	-
Pseudohygrohypnum fauriei	Hy990	Russia: Primorsky, Olkhovaya, Ignatov et al. 06-2398 (MHA)	MH613420	MZ209554	MH613645	MH613532	-	-
Pseudohygrohypnum fertile	Hy1038	Czech Republic: Žofín, Kučera 17180 (CBFS)	MH613422	MZ209551	MH613647	MH613534	OK847683	OK847711
Pseudohygrohypnum fertile	Hy655	Ukraine, Ripa s.n. (MW)	MH613421	MZ209550	MH613646	MH613533	-	-
Pseudohygrohypnum neglectum	HyF17	Khabarovsk Territory, Badzhal Mts, Fedosov 9.VIII.2016 (MW)	MZ218010	MZ209588	MZ209512	MZ209429	OK847690	OK847718
Pseudohygrohypnum neglectum	HyF27	Khabarovsk Territory, Badzhal Mts, Fedosov (MW9077401)	MZ218011	MZ209589	MZ209513	MZ209430	-	-
Pseudohygrohypnum neglectum	HyF43	Maine, Allen 29078 (MO)	MZ218012	MZ209590	MZ209514	MZ209431	-	-
Pseudohygrohypnum neglectum	HyF58	Khabarovsk Territory, Dusse-Alin (MHA9046098)	MZ218013	MZ209591	MZ209515	MZ209432	-	-
Pseudohygrohypnum neglectum x subarcticum	Hh2520	Russia, Khabarovsk Territory, Badzhal Mts, Fedosov CBFS	OK632076	OK666855	-	-	-	-
Pseudohygrohypnum neglectum x subarcticum	n HyF5	Russia, Yakutia Rep., Tomponsky Distr., Ignatov & Ignatova 12-2242 (MW)	MZ218050	MZ209592	MZ209516	MZ209469	-	-
Pseudohygrohypnum neglectum x subarcticum	n HyF55	Russia, Khabarovsk Territory, Dusse-Alin Range (MW9060476)	MZ218051	MZ209593	MZ209517	MZ209470	-	-
Pseudohygrohypnum orientale	Hh1898	Russia, Primorsky Territory, Elomovsky Klyuch Kucera 21474 CBFS	OK632067	OK666854	OK666864	-	-	-
Pseudohygrohypnum orientale	HyF1	Primorsky Territory, Partizansk Distr., Olchovaya Mt, Ignatov 06-2399 (MW)	MZ218009	MZ209542	MZ209475	MZ209428	OK847680	OK847708
Pseudohygrohypnum orientale	HyF2	Primorsky Territory, Olga Distr., Milogradovskie waterfalls, Ignatov 07-316 (MW)	MZ218008	MZ209541	MZ209474	MZ209427	-	-
Pseudohygrohypnum orientale	HyF49	Primorsky Territory, Partizansk Distr., Olchovaya Mt, Ignatov (LE)	MZ218007	MZ209540	MZ209473	MZ209426	-	-
Pseudohygrohypnum orientale	HyF53	Primorsky Territory, Lazo Distr., Benevskie waterfalls (MHA9046080)	MZ218006	MZ209539	MZ209472	MZ209425	-	-
Pseudohygrohypnum orientale	HyF62	Russia, Sakhalin Province, Shikotan Island, Dimitrova Bay (MW9116127)	OK632068	OK666850	OK666860	OK666866	-	-
Pseudohygrohypnum orientale	HyF63	Russia, Sakhalin Province, Shikotan Island, Dimitrova Bay (MW9116128)	OK632069	OK666851	OK666861	OK666867	-	-
Pseudohygrohypnum orientale	HyF64	Russia, Sakhalin Province, Shikotan Island, Malokuril'skoe (MW9116126)	OK632070	OK666852	OK666862	OK666868	-	-
Pseudohygrohypnum orientale	HyF65	Russia, Sakhalin Province, Shikotan Island, Malokuril'skoe (MW9116134)	OK632071	OK666853	OK666863	OK666869	-	-
Pseudohygrohypnum purpurascens	HyF20	Russia, Primorsky Territory, Lazo Distr., Elomovsky Klyuch, Fedosov s.n. (MW)	MZ218021	MZ209558	MZ209483	MZ209440	-	-
Pseudohygrohypnum purpurascens	HyF28	Russia, Sakhalin Province, Iturup Island, Fedosov (MW9060477)	MZ218024	MZ209559	MZ209484	MZ209443	-	-
Pseudohygrohypnum purpurascens	HyF29	Russia, Sakhalin Province, Shikotan Island, Bakalin (MW9060475)	MZ218025	MZ209560	MZ209485	MZ209444	-	-
Pseudohygrohypnum purpurascens	HyF44	China, Yunnan, Shevock 30900	MZ218026	MZ209561	MZ209486	MZ209445	-	-
Pseudohygrohypnum purpurascens	HyF45	China, Yunnan, Shevock 25337	MZ218027	MZ209562	MZ209487	MZ209446	-	-
Pseudohygrohypnum purpurascens	HyF52	Russia, Primorsky Territory, Lazo Distr., Elomovsky Klyuch, 13-1388 (MHA)	MZ218019	MZ209556	MZ209481	MZ209438	-	-
Pseudohygrohypnum purpurascens	HyF6	Russia, Primorsky Territory, Partizansk Distr., Ol'chovaya Mt, Fedosov s.n. (MW)	MZ218020	MZ209557	MZ209482	MZ209439	OK847686	OK847714
Pseudohygrohypnum purpurascens	HyF61	Russia, Primorsky Territory, Shkotovsky Distr., Pidan Mt. (MW9060473)	MZ218022	MZ209563	MZ209488	MZ209441	-	-
Pseudohygrohypnum sibiricum	Hh1896	Russia, Primorsky Territory, Elomovsky Klyuch Kucera 21478 CBFS	OK632072	OK666856	OK666865	-	-	-
Pseudohygrohypnum sibiricum	Hh1900	Russia, Primorsky Territory, Elomovsky Klyuch Kucera 21434 CBFS	OK632073	OK666857	-	-	-	-
Pseudohygrohypnum sibiricum	Hh2513	Russia, Primorsky Territory, Pidan Mt., Kucera 21737 CBFS	OK632074	OK666858	-	-	-	-
Pseudohygrohypnum sibiricum	Hh2514	Russia, Primorsky Territory, Pidan Mt., Kucera 21701 CBFS	OK632075	OK666859	-	-	-	-
Pseudohygrohypnum sibiricum	HyF12	Russia, Zabaikalsky Territory, Sokhondo Nature Reserve, Czernyadjeva 12.VII.2010, LE	MZ218038	MZ209573	MZ209497	MZ209454	-	-
Pseudohygrohypnum sibiricum	HyF18	Russia, Khabarovsk Territory, Badzhal Mts, Fedosov 30.VII.2016 (MW)	MZ218035	MZ209576	MZ209500	MZ209457	-	-
Pseudohygrohypnum sibiricum	HyF19	Russia, Primorsky Territory, Shkotovsky Distr., Pidan Mt., Fedosov s.n. (MW)	MZ218039	MZ209574	MZ209498	MZ209455	-	-
Pseudohygrohypnum sibiricum	HyF25	Russia, Zabaikalsky Territory, Kodar Range, Afonina 11.VI.2015 (LE)	MZ218042	MZ209580	MZ209504	MZ209461	-	-
Pseudohygrohypnum sibiricum	HyF4	Russia, Altay Territory, Chulcha River, Ignatov & Ignatova 12-854	MZ218034	MZ209572	MZ209496	MZ209453	-	-
Pseudohygrohypnum sibiricum	HyF46	Russia, Zabaikalsky Territory, Kodar Range, Czernyadjeva 3.VII.2013 (MHA)	MZ218043	MZ209575	MZ209499	MZ209456	-	-
Pseudohygrohypnum sibiricum	HyF47	Russia, Zabaikalsky Territory, Kodar Range, Afonina 7.VII.2013 (LE)	MZ218036	MZ209577	MZ209501	MZ209458	-	-
Pseudohygrohypnum sibiricum	HyF50	Russia, Zabaikalsky Territory, Sokhondo Nature Reserve, Czernyadjeva 9.VII.2010 (LE)	MZ218041	MZ209579	MZ209503	MZ209460	OK847688	OK847716
Pseudohygrohypnum sibiricum	HyF60	Russia, Primorsky Territory, Dalnegorsk Distr., Fedosov s.n. (MW)	MZ218040	MZ209581	MZ209505	MZ209462	-	-
Pseudohygrohypnum sibiricum	HyF7	Russia, Bashkiria Rep., South Urals, Baisheva 27.VII.1996 (MW9060449)	MZ218037	MZ209578	MZ209502	MZ209459	-	-
Pseudohygrohypnum sibiricum x purpurascens	Hh1585	Russia, Irkutsk Province, Slyudyanka District, Khamar-Daban Range 20629 (CBFS)	MZ218023	MZ209571	MZ209495	MZ209452	-	-
Pseudohygrohypnum skottsbergii	Hy1538	Chile: Tierra del Fuego,vIsla Hoste, DUKE:B.Shaw 18033	MK327342	MZ209555	MK314026	MK313940	OK847685	OK847713
Pseudohygrohypnum skottsbergii	Hy1539	Chile: Tierra del Fuego,Isla Navarino, DUKE:B.Shaw 18489	MK327343	-	-	MK313941	-	-
Pseudohygrohypnum subarcticum	HyF21	Russia, Krasnoyarsk Territory, Taimyr Distr., Anabar Plateau, Fedosov (MW9060458)	MZ218045	MZ209582	MZ209506	MZ209463	-	-
Pseudohygrohypnum subarcticum	HyF23	Russia, Krasnoyarsk Territory, Taimyr Distr., Putorana Plateau, Glubokoe Lake, Fedosov (MW9060452)	MZ218047	MZ209587	MZ209511	MZ209468	-	-
Pseudohygrohypnum subarcticum	HyF24	Russia, Krasnoyarsk Territory, Taimyr Distr., Byrranga Range, Fedosov (MW9060465)	MZ218046	MZ209583	MZ209507	MZ209464	-	-
Pseudohygrohypnum subarcticum	HyF3	Russia, Krasnoyarsk Territory, Taimyr Distr., Anabar Plateau, Fedosov 11-1437	MZ218044	MZ209586	MZ209510	MZ209467	OK847689	OK847717
Pseudohygrohypnum subarcticum	HyF54	Russia, Krasnoyarsk Territory, Taimyr Distr., Anabar Plateau, Fedosov (MW9060464)	MZ218048	MZ209584	MZ209508	MZ209465	-	-
Pseudohygrohypnum subarcticum	HyF56	Russia, Krasnoyarsk Territory, Taimyr Distr., Anabar Plateau, Fedosov (MW9060470)	MZ218049	MZ209585	MZ209509	MZ209466	-	-
Pseudohygrohypnum subeugyrium	Hakelier	Sweden, MHA (from S), coll. Hakelier	AY857609	MZ209570	AY857567	AY857588	-	-
Pseudohygrohypnum subeugyrium	HyF35	UK, Scotland, Rothero, 2019001	MZ218029	MZ209564	MZ209489	MZ209442	OK847687	OK847715
Pseudohygrohypnum subeugyrium	HyF36	UK, Scotland, Rothero, 2019029	MZ218030	MZ209565	MZ209490	MZ209447	-	-
Pseudohygrohypnum subeugyrium	HyF37	UK, Scotland, Rothero, 2019176	MZ218031	MZ209566	MZ209491	MZ209448	-	-
Pseudohygrohypnum subeugyrium	HyF40	USA, Maine, Allen 24431 (MO)	MZ218032	MZ209567	MZ209492	MZ209449	-	-
Pseudohygrohypnum subeugyrium	HyF41	USA, New York, Allen 27202 (MO)	MZ218033	MZ209568	MZ209493	MZ209450	-	-
Pseudohygrohypnum subeugyrium	P2274	USA, Virginia, Nelson county Hamilton 742 (DUKE)	MZ218028	MZ209569	MZ209494	MZ209451	-	-
Pseudostereodon procerrimus	Hy1012	Austria: Carinthia,Stockerscharte, Kučera 12808 (CBFS)	MH613448	MZ209522	MH613673	MH613551	OK847678	OK847706
Pseudostereodon procerrimus	Hy253	Russia: Anabar, Fedosov 5-520 (MHA)	MH613446	-	MH613671	MH613550	-	-
Pylaisia condensata	Py1511	Russia: Irkutskaya,Snezhnaya River, CBFS:Kucera 20330	MK327358	-	MK314041	MK313957	-	-
Pylaisia polyantha	Py1353	Czech Republic: Mikulov, Kučera 19399 (CBFS)	MH613484	MZ209530	MH613709	MH613570	OK847692	OK847720
Pylaisia steerei	Py1512	Russia: Buryatia,Vydrinaya River, CBFS:Kucera 20339	MK327359	-	MK314042	MK313958	-	-
Roaldia dolomitica	Hy543	Austria: Mt Hochmoelbing, CBFS:Kučera 12478	MH613452	-	MH613677	MH613554	-	-
Roaldia revoluta	Hy542	Austria: Mt Hochgolling, CBFS:Kučera 9390	MH613453	MZ209524	MH613678	MH613555	OK847677	OK847705
Roaldia revoluta	Hy658	Russia: Yakutia, Ignatov 11-3566 (MHA)	MH613455	-	MH613680	MH613556	-	-
Stereodon callichrous	Hy539	Czech Republic: Labsky dul, Kucera 14832 (CBFS)	MH613394	MZ209520	MH613620	-	OK847665	OK847693
Stereodon pratensis	Hy1011	Czech Republic: Bazantka, Kucera 15101 (CBFS)	MH613353	MZ209521	MH613579	MH613492	OK847666	OK847694
Vesicularia reticulata	Ve1487	Japan, Kyushu Ignatov & Ignatova 98-601 CBFS 20254	MK327363	MZ209536	MK314046	MK313963	OK847671	OK847699
