# Supplementary material for: Need for split: integrative taxonomy reveals unnoticed diversity in the subaquatic species of Pseudohygrohypnum (Pylaisiaceae, Bryophyta)
Source: PeerJ. 2022 Apr 26;10:e13260. doi: 10.7717/peerj.13260 (PMC9053303; doi:10.7717/peerj.13260)
Supplement: Supplemental Information 6 [file peerj-10-13260-s006.xls]

## Sheet: cloglog
Species		P. eugirium (eu)	P. eugirium (na)	P. orientale	P. subeugirium	P. sibiricum	P. arcticum	P. purpurascens
Presence records		63	80	21	59	18	25	28
AUC		0.989	0.985	0.989	0.986	0.915	0.961	0.984
maxSS threshold	threshold	0.066	0.311	0.341	0.301	0.294	0.208	0.364
	FPA	0.053	0.5	0.81	0.048	0.196	0.089	0.085		#N/A
	training OR	0.000	0.025	0.000	0.034	0.056	0.040	0.000
minimum training presence	threshold	0.066	0.111	0.341	0.067	0.192	0.018	0.364
	FPA	0.053	0.082	0.081	0.101	0.290	0.255	0.085
	training OR	0.000	0.000	0.000	0.000	0.000	0.000	0.000
10 ptp threshold	threshold	0.203	0.516	0.882	0.404	0.294	0.216	0.477
	FPA	0.028	0.034	0.014	0.038	0.196	0.087	0.061
	training OR	0.096	0.1	0.095	0.085	0.056	0.080	0.071
Percent contribution of variables	ai	2.6	1.3	14.9	19.2	0	7.5	14.6
	bio1	9.8	1.3	1.3	30.7	9.7	73.7	4.2
	bio2	4	0	4.4	1.2	0	0.1	4
	bio7	71.5	5.8	4.9	0.4	12.8	13.1	0.8
	bio12	1.2	0.1	0	0.6	0	0	0
	bio15	6.1	49.3	0.2	1.8	32.9	0	0
	bio17	4.9	41.8	0	43.4	3.3	0	0
	bio18	0	0.4	74.1	0.2	18.4	1.4	76.3
	bio19	0	0	0.1	2.5	23	4.1	0
Permutation importance of variables	ai	0.2	4.6	3	34.2	0	9.3	0.7
	bio1	39.3	9.9	0.8	53.1	8.1	75.9	3.1
	bio2	0.3	0	13	0	0	0	17
	bio7	58.5	8.1	4	2.6	0	5.5	0.8
	bio12	0.4	1.9	0	0.5	0	0	0
	bio15	0.6	52.2	0	7.4	0	0	0
	bio17	0.8	23.1	0	2.6	8.6	0	0
	bio18	0	0.1	79.1	0.8	83.3	7.4	78.3
	bio19	0	0	0	0.9	0	1.8	0
		maxSS – maximum training sensitivity plus specificity
		10 ptp - 10 percentile training presence
		FPA - fractional predicted area (calculated from North America and Eurasia areas only)
		training OR – training omission rate
		Eu – European localities
		NA – Noreth America localities

## Sheet: cumulative
Species		P. eugirium (eu)	P. eugirium (na)	P. orientale	P. subeugirium	P. sibiricum	P. arcticum	P. purpurascens
Presence records		63	80	21	59	18	25	28
AUC		0.986	0.985	0.989	0.986	0.915	0.961	0.984
maxSS threshold	cum threshold	13.177	18.229	23.274	17.063	20.143	14.584	28.359
	FPA	0.052	0.050	0.081	0.048	0.196	0.089	0.085
	training OR	0.016	0.025	0.000	0.034	0.056	0.040	0.000
10 ptp threshold	cum threshold	18.953	28.253	64.746	23.376	20.143	15.054	35.355
	FPA	0.037	0.034	0.014	0.038	0.196	0.087	0.061
	training OR	0.095	0.100	0.095	0.085	0.056	0.080	0.071
Percent contribution of variables	ai	2.5	1.3	14.9	19.2	0	7.5	14.6
	bio1	12.6	1.3	1.3	30.7	9.7	73.7	4.2
	bio2	0.8	0	4.4	1.2	0	0.1	4
	bio7	40.6	5.8	4.9	0.4	12.8	13.1	0.8
	bio12	0	0.1	0	0.6	0	0	0
	bio15	2.7	49.3	0.2	1.8	32.9	0	0
	bio17	40.8	41.8	0	43.4	3.3	0	0
	bio18	0	0.4	74.1	0.2	18.4	1.4	76.3
	bio19	0	0	0.1	2.5	23	4.1	0
Permutation importance of variables	ai	0	4.6	3	34.2	0	9.3	0.7
	bio1	50.1	9.9	0.8	30.7	8.1	75.9	3.1
	bio2	0.1	0	13	0	0	0	17
	bio7	47.9	8.1	4	0.4	0	5.5	0.8
	bio12	0	1.9	0	0.5	0	0	0
	bio15	0.1	52.2	0	7.4	0	0	0
	bio17	1.6	23.1	0	2.6	8.6	0	0
	bio18	0.2	0.1	79.1	0.8	83.3	7.4	78.3
	bio19	0	0	0	0.9	0	1.8	0
		maxSS – maximum training sensitivity plus specificity
		cum threshold – cumulative threshold
		10 ptp - 10 percentile training presence
		FPA - fractional predicted area (calculated from North America and Eurasia areas only)
		training OR – training omission rate
		Eu – European localities
		NA – Noreth America localities

## Sheet: cloglog_for_pres
Species		eu A	eu B	eu C	seu A	seu B	seu C	seu E
Presence records		63	80	21	59	18	28	25
AUC		0.989	0.985	0.989	0.986	0.915	0.984	0.961
Percent contribution of variables	ai	2.6	1.3	14.9	19.2	0	14.6	7.5
	bio1	9.8	1.3	1.3	30.7	9.7	4.2	73.7
	bio2	4	0	4.4	1.2	0	4	0.1
	bio7	71.5	5.8	4.9	0.4	12.8	0.8	13.1
	bio12	1.2	0.1	0	0.6	0	0	0
	bio15	6.1	49.3	0.2	1.8	32.9	0	0
	bio17	4.9	41.8	0	43.4	3.3	0	0
	bio18	0	0.4	74.1	0.2	18.4	76.3	1.4
	bio19	0	0	0.1	2.5	23	0	4.1
Permutation importance of variables	ai	0.2	4.6	3	34.2	0	0.7	9.3
	bio1	39.3	9.9	0.8	53.1	8.1	3.1	75.9
	bio2	0.3	0	13	0	0	17	0
	bio7	58.5	8.1	4	2.6	0	0.8	5.5
	bio12	0.4	1.9	0	0.5	0	0	0
	bio15	0.6	52.2	0	7.4	0	0	0
	bio17	0.8	23.1	0	2.6	8.6	0	0
	bio18	0	0.1	79.1	0.8	83.3	78.3	7.4
	bio19	0	0	0	0.9	0	0	1.8
